# Supplementary material
Source: publisher site journal article supplement (https://www.dovepress.com/article/508091)
Supplement: Supplementary file 1 [file get_supplementary_file.php]

**Supplementary Figures**


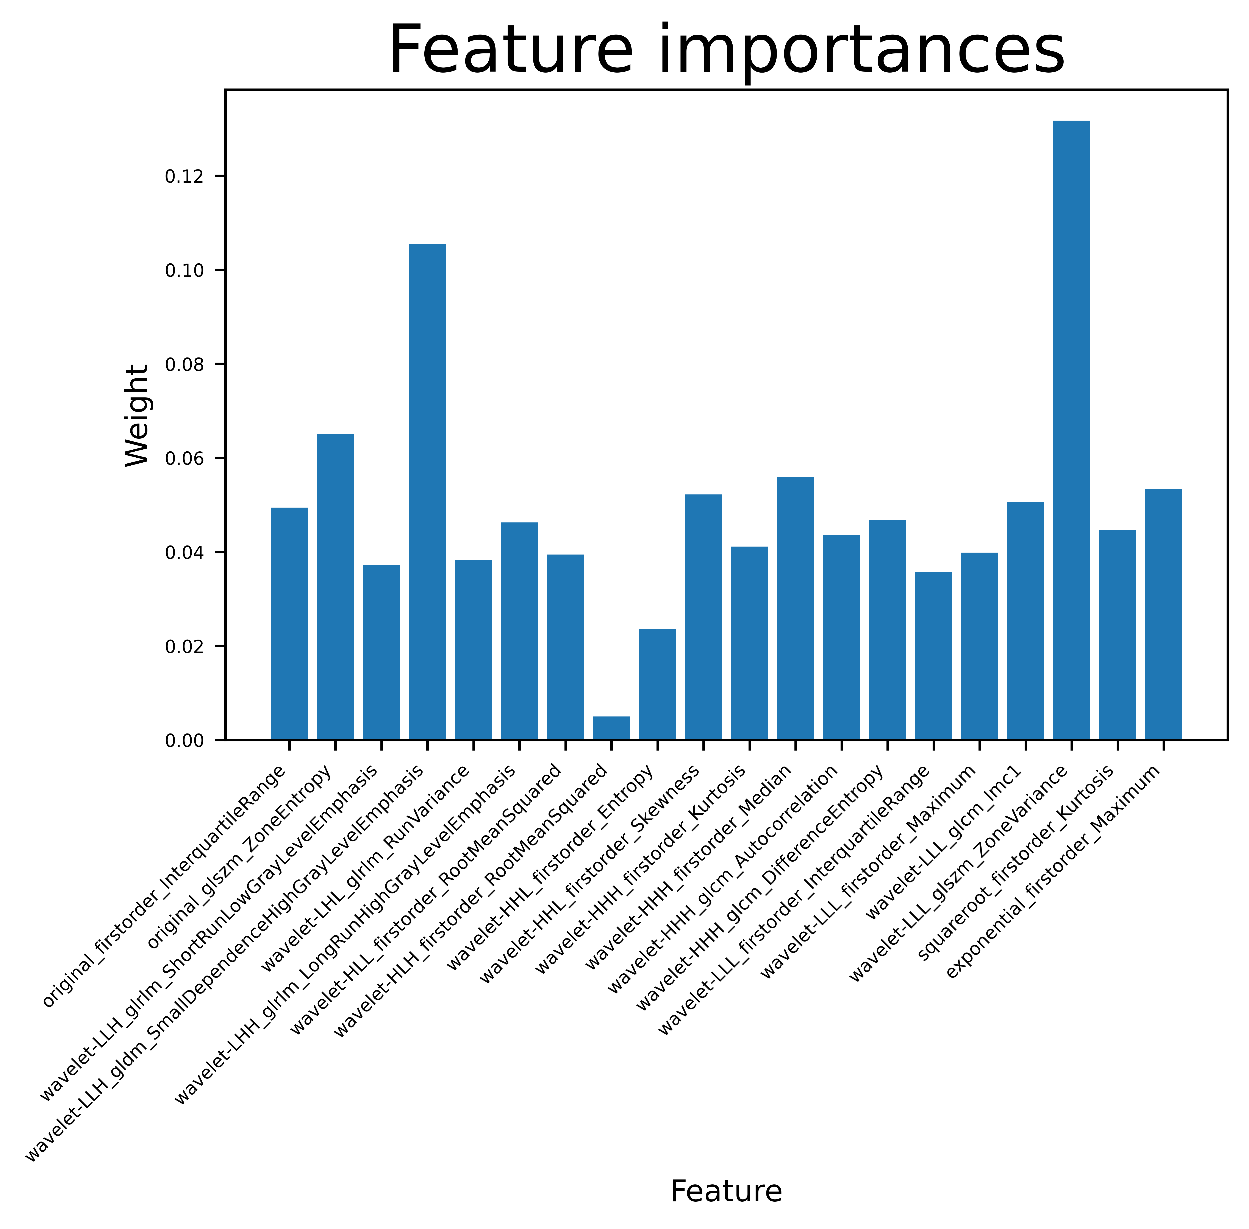


**Supplementary Figure 1.** The feature significance graph shows 20 important radiomics signatures and their corresponding feature coefficients.

**20 corresponding feature coefficients:**

0.04943341, 0.0650934 , 0.03715707, 0.10543799, 0.03823163,

0.0462575 , 0.03942079, 0.00001 , 0.02353024, 0.05219965,

0.04114265, 0.05598072, 0.04353325, 0.04680411, 0.03569015,

0.03983657, 0.05059297, 0.13172768, 0.04463004, 0.05330012


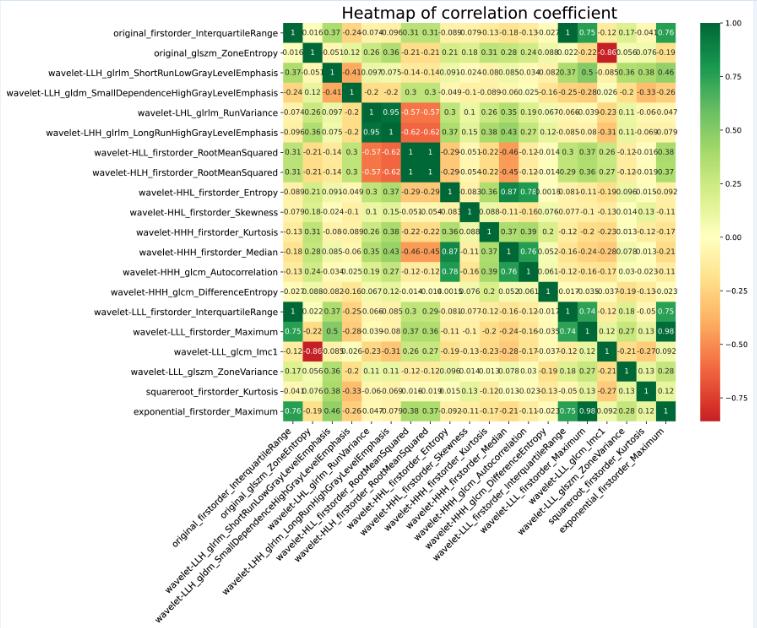


**Supplementary Figure 2.** The feature heatmap displays the correlation between 20 important radiomics signatures extracted from the training data set by color. The greener the color, the higher the correlation. Conversely, the redder the color, the lower the correlation.
